# Supplementary material for: Diversity of Campylobacter spp. circulating in a rhesus macaque (Macaca mulatta) breeding colony using culture and molecular methods
Source: PubMed Central journal article supplement (PMC11580467; doi:10.1128/msphere.00560-24), 2024-10-23
Supplement: msphere.00560-24-s0001.pdf [file msphere.00560-24-s0001.pdf]

## 1 **Supplemental Methods and Results**

### 2 *Validation of C. coli* qPCR

3 A referable clinical test was not available for the detection of *Campylobacter coli* using  
4 quantitative PCR (qPCR) from rectal swabs, as was available for the detection of *C. jejuni*. Initial  
5 tests for primer selection and validation of standard curves were required, as well as the  
6 validation of multiplexing capability with the Xeno™ Internal Control and OSM assays. Primer  
7 and probe combinations selected for trial were *cadF*, *ceuE*, and *glyA*, based on previous  
8 publications.<sup>1,3,4,5</sup> DNA extracted from a pure colony of *C. coli* (ATCC 49941) was used to  
9 determine the ideal concentration of each primer-probe combination. *CadF* and *ceuE*  
10 combinations behaved similarly regardless of the concentration and 300 nM of each primer and  
11 100 nM of each probe were selected as the concentrations for all future work. *GlyA* produced  
12 poor amplification regardless of concentration (data not shown) and was removed from further  
13 analysis. To select between *cadF* and *ceuE*, each primer-probe set was tested against a  
14 standard curve multiplexed with the Xeno™ Internal Control assay. The Xeno™ Internal Control  
15 assay performed better in conjunction with the *cadF* primers and probe (Table S4), so *cadF* was  
16 selected as the detection method for *C. coli* in the rhesus macaque fecal DNA samples. The  
17 *cadF*+ Xeno™ Internal Control assay was also tested for inclusivity and exclusivity against other  
18 common *Campylobacter* species. The assay detected four different strains of *C. coli* (BAA370,  
19 BAA371, BAA1061, ATCC 49941), and displayed no amplification of DNA from two strains of *C.*  
20 *fetus venerealis* (ATCC 19438, ATCC 33561), two strains of *C. fetus fetus* (ATCC 27374, ATCC  
21 25936), or a strain of *C. jejuni* (ATCC 33560). The *cadF* assay was also multiplexed with the  
22 NHP OSM assay as above.<sup>2</sup> Each assay was tested at varying ratios of *Campylobacter* to  
23 rhesus macaque DNA and the functionality of the three primers (*cadF/gyrA*, OSM, and Xeno™  
24 Internal Control) tested in triplicate (Table S5). Ultimately, these efforts resulted in a final  
25 reaction of 2 µL of each DNA sample and blank combined with 4.35 µL of nuclease-free water  
26 (Invitrogen, Waltham, MA), 5 µL of Taqman Fast Virus 1-step Master Mix 4x (Thermo Fisher,

27 Cleveland, OH), 1  $\mu$ L (300 nM) of forward and reverse primers for the *C. coli cadF* gene, 0.4  $\mu$ L  
28 (100 nM) of the probe for the *C. coli cadF* gene, 1  $\mu$ L of Xeno™ Assay, and 2.5  $\mu$ L (1  $\mu$ M)  
29 forward and reverse primers for the NHP *OSM* gene, and 0.25  $\mu$ L (100 nM) probe for the NHP  
30 *OSM* gene, for a total reaction volume of 20  $\mu$ L per sample. As with the *C. jejuni* reaction, each  
31 set of reactions was run with a standard curve of known quantities of *C. coli* (ATCC 49941), 2  $\mu$ L  
32 of nuclease-free water as a no-template negative control, 2  $\mu$ L of DNA extracted from rhesus  
33 macaque whole blood as a positive control for the *OSM*, and 2  $\mu$ L Xeno™ Internal Control DNA  
34 as a positive control for the Xeno™ Internal Control. The reaction parameters were identical to  
35 the *C. jejuni gyrA* reaction.

36

#### 37 *Validation of C. coli and C. jejuni qPCR on archived samples*

38 To assess the utility of the assays with respect to archived samples, validation trials to  
39 mimic DNA extraction and qPCR from frozen swabs were performed using canine feces  
40 negative for *Campylobacter* species and then spiked with known quantities of *C. coli*. Swabs  
41 were spiked and DNA immediately extracted on Day 0. A second set of swabs were spiked at  
42 stored for 1 month at -80°C, and a third set was spiked and stored in Amies Remel™  
43 BactiSwab™ Gel Collection and Transport Swab (Fisher Scientific, Waltham, MA) for 1 month at  
44 -80°C. DNA extraction was performed on the second and third set on the same day after 30  
45 days of freezing. DNA extract from all three sets of swabs were stored at -20°C and qPCR  
46 performed on the same day. The assay behaved similarly at both time points, however there  
47 was more variable detection limits in the freezer stored samples, particularly at *C. coli*  
48 concentrations  $\leq$  26,000 CFU/mL (Figure S1). Similar methods were applied to the *C. jejuni*  
49 assay (data not shown). Given these results and logistic limitations to performing same day  
50 DNA extractions on freshly collected swabs from the rhesus macaques, a higher cycle number  
51 (45) was selected to avoid classifying an animal shedding  $\leq$  26,000 CFU/mL as negative,

52 limiting potential misclassification of animals which were positive as negative to those shedding  
53  $\leq 2,600$  CFU/mL.

54

55 **Supplemental References**

- 56 1. Best EL, Powell EJ, Swift C, Grant KA, Frost JA. Applicability of a rapid duplex real-time PCR  
57 assay for speciation of *Campylobacter jejuni* and *Campylobacter coli* directly from culture plates.  
58 *FEMS Microbiology Letters*. 2003;229: 237-241.
- 59 2. Bruce AG, Bakke AM, Thouless ME, Rose TM. Development of a real-time QPCR assay for  
60 the detection of RV2 lineage-specific rhadinoviruses in macaques and baboons. *Virology*  
61 *journal*. 2005;2: 1-12.
- 62 3. Leblanc-Maridor M, Beaudeau F, Seegers H, Denis M, Belloc C. Rapid identification and  
63 quantification of *Campylobacter coli* and *Campylobacter jejuni* by real-time PCR in pure cultures  
64 and in complex samples. *BMC microbiology*. 2011;11: 1-16.
- 65 4. Tissier A, Denis M, Hartemann P, Gassilloud B. Development of a rapid and sensitive method  
66 combining a cellulose ester microfilter and a real-time qPCR assay to detect *Campylobacter*  
67 *jejuni* and *Campylobacter coli* in 20 liters of drinking water or low turbidity waters. *Applied and*  
68 *Environmental Microbiology*. 2011.
- 69 5. Toplak N, Kovač M, Piskernik S, Možina SS, Jeršek B. Detection and quantification of  
70 *Campylobacter jejuni* and *Campylobacter coli* using real-time multiplex PCR. *Journal of applied*  
71 *microbiology*. 2012;112: 752-764.

72

73

74 **Supplemental Tables and Figures**

75 Table S4: Average number of amplification cycles required to cross threshold for each primer set  
 76 tested in duplicate.

| CFU/mL     | <i>ceuE</i> qPCR  |                         | <i>cadF</i> qPCR  |                         |
|------------|-------------------|-------------------------|-------------------|-------------------------|
|            | <i>ceuE</i><br>Ct | Xeno <sup>a</sup><br>Ct | <i>cadF</i><br>Ct | Xeno <sup>a</sup><br>Ct |
| 18,000,000 | 20.68             | 40.00                   | 21.57             | 33.98                   |
| 1,800,000  | 27.10             | 40.00                   | 27.72             | 32.98                   |
| 180,000    | 31.62             | 39.59                   | 32.19             | 34.11                   |
| 18,000     | 33.24             | 35.70                   | 34.52             | 32.32                   |
| 1,800      | 36.52             | 35.74                   | 38.92             | 32.77                   |
| 180        | 39.89             | 36.90                   | 40.00             | 33.90                   |

<sup>a</sup>Applied Biosystems™ VetMAX™ Xeno™ Internal Positive Control DNA and Assay. The Xeno™ Internal Positive Control DNA is added to samples prior to extraction as an extraction and PCR inhibition control.

Abbreviations: CFU/mL, colony forming units per millileter; qPCR, quantitative PCR; Ct, cycle threshold

77

78

79

80

81

82

83

84

85

86 Table S5: Average number of amplification cycles required to cross threshold for multiplexed  
 87 qPCR assays tested in triplicate.

| <b><i>C. coli cadF+OSM Assay</i></b> |                    |                        |                    |                |               |  |
|--------------------------------------|--------------------|------------------------|--------------------|----------------|---------------|--|
| CFU/mL                               | NHP DNA<br>(ng/mL) | <i>cadF</i> qPCR<br>Ct | <i>cadF</i> St Dev | OSM qPCR<br>Ct | OSM St<br>Dev |  |
| 25,200                               | 0.158              | 32.39                  | 0.13               | 31.60          | 0.28          |  |
| 2,520                                | 0.158              | 35.53                  | 0.18               | 31.87          | 0.28          |  |
| 252                                  | 0.158              | 45.00                  | 0.00               | 31.68          | 0.12          |  |
| 25,200                               | 1.58               | 32.13                  | 0.37               | 28.48          | 0.03          |  |
| 2,520                                | 1.58               | 35.33                  | 0.82               | 28.62          | 0.09          |  |
| 252                                  | 1.58               | 45.00                  | 0.00               | 28.78          | 0.18          |  |

| 25,200                                                         | 15.8                     | 32.03               | 0.17                     | 25.55       | 0.19       |
|----------------------------------------------------------------|--------------------------|---------------------|--------------------------|-------------|------------|
| 2,520                                                          | 15.8                     | 40.04               | 4.38                     | 25.28       | 0.01       |
| 252                                                            | 15.8                     | 45.00               | 0.00                     | 25.31       | 0.07       |
| <b><i>C. jejuni gyrA+OSM Assay</i></b>                         |                          |                     |                          |             |            |
| CFU/mL                                                         | NHP DNA (ng/mL)          | <i>gyrA</i> qPCR Ct | <i>gyrA</i> St Dev       | OSM qPCR Ct | OSM St Dev |
| 6,400                                                          | 0.158                    | 33.86               | 0.32                     | 31.16       | 0.21       |
| 640                                                            | 0.158                    | 39.02               | 5.18                     | 31.04       | 0.15       |
| 64                                                             | 0.158                    | 45.00               | 0.00                     | 30.89       | 0.26       |
| 6,400                                                          | 1.58                     | 34.17               | 0.73                     | 27.66       | 0.51       |
| 640                                                            | 1.58                     | 39.20               | 5.14                     | 28.17       | 0.17       |
| 64                                                             | 1.58                     | 45.00               | 0.00                     | 28.43       | 0.10       |
| 6,400                                                          | 15.8                     | 33.64               | 0.15                     | 24.81       | 0.05       |
| 640                                                            | 15.8                     | 38.69               | 5.46                     | 24.88       | 0.10       |
| 64                                                             | 15.8                     | 45.00               | 0.00                     | 24.59       | 0.18       |
| <b><i>cadF gyrA+OSM+Xeno™ Multiplex Assays<sup>a</sup></i></b> |                          |                     |                          |             |            |
|                                                                | <i>cadF</i> qPCR Ct      | 23.82               | <i>gyrA</i> qPCR Ct      | 14.67       |            |
|                                                                | <i>cadF</i> St Dev       | 1.61                | <i>gyrA</i> St Dev       | 0.50        |            |
|                                                                | OSM qPCR Ct <sup>b</sup> | 29.63               | OSM qPCR Ct <sup>b</sup> | 30.07       |            |
|                                                                | OSM St Dev               | 0.61                | OSM St Dev               | 0.08        |            |
|                                                                | Xeno™ Ct                 | 30.77               | Xeno™ Ct                 | 32.16       |            |
|                                                                | Xeno™ St Dev             | 0.36                | Xeno™ St Dev             | 0.09        |            |

<sup>a</sup>Bacterial DNA was obtained from direct boiling of several bacterial colonies following 48 hour incubation at 42°C.

<sup>b</sup>NHP DNA concentration used for complete multiplex trials was 1.58 ng/mL.

Abbreviations: CFU/mL, colony forming units per millileter; NHP, non-human primate; OSM, non-human primate oncostatin M; St Dev, standard deviation

88

89

90

91

92 Figure S1: Validation of qPCR on DNA extracted from fresh and frozen canine fecal swabs  
93 negative for *Campylobacter* sp. and spiked with a known concentration of *C. coli*. DNA was  
94 extracted from the swabs directly after spiking (Day 0), following 30 days of freezing at -80°C in  
95 no media (Day 30 without media), and following 30 days of freezing at -80°C in Amies Clear  
96 media (Day 30 with media), and qPCR for *C. coli* performed as described.

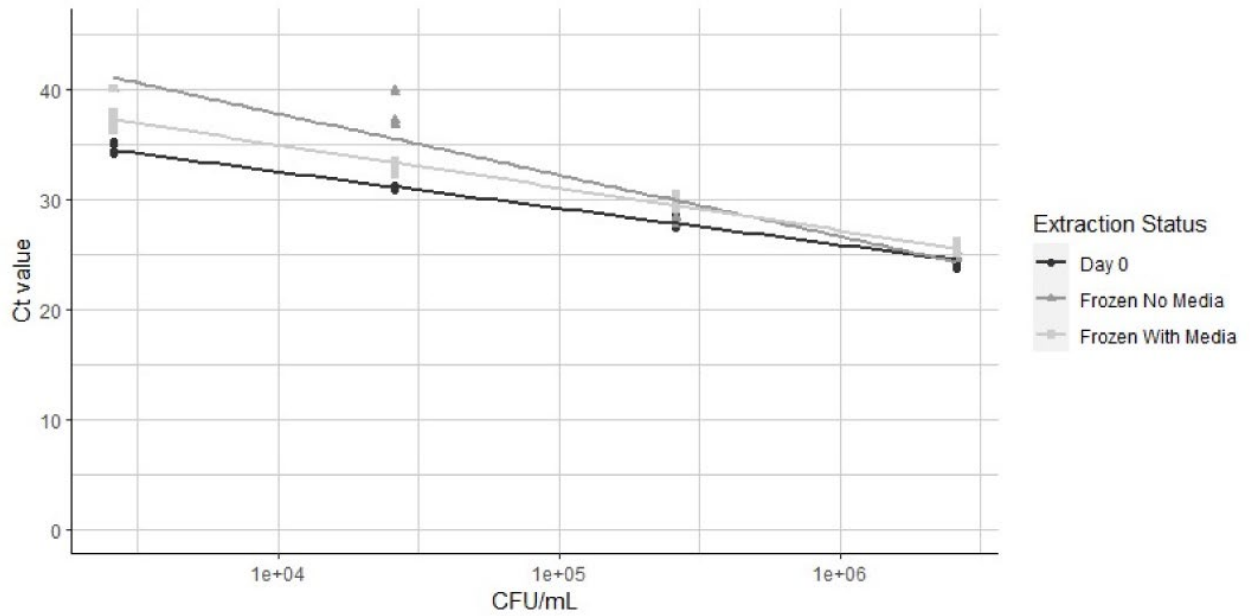

97

98

99

100
